## Supplementary data:

A

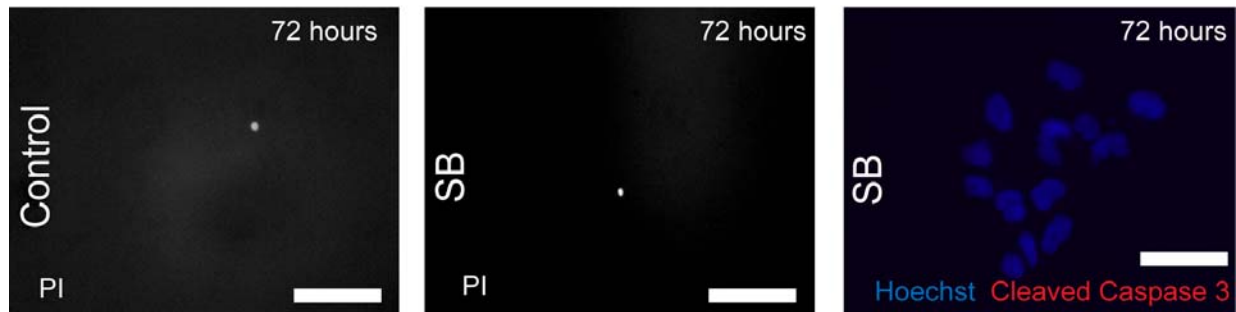

B

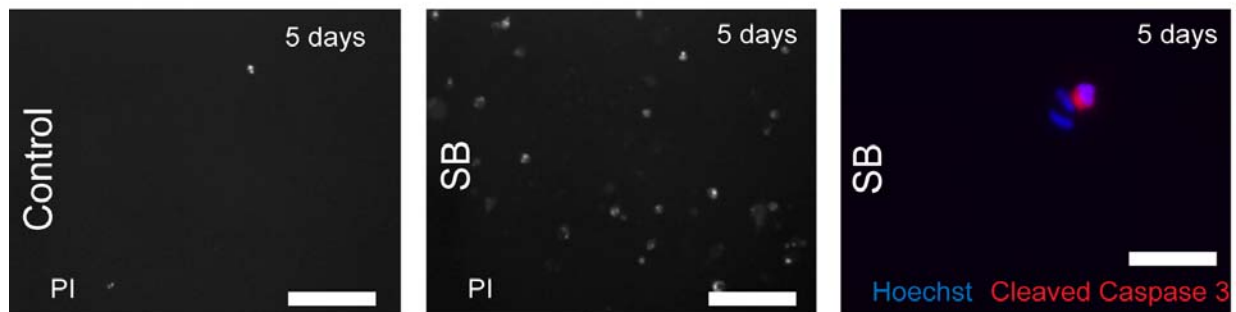

**Supplementary Figure 1: HDAC inhibition induces apoptosis in a time-dependent manner.** A) The DNA was stained with propidium iodide (PI) after 72 hours of vehicle (Control) or SB treatment (SB). In addition, cells were stained for cleaved caspase 3. B) Cultures treated for 5 days with SB showed a high number of PI positive cells, which were not present in the control condition. The presence of cleaved-caspase 3 confirmed the induction of apoptosis upon HDAC inhibition for 5 days. The scale bars represent 50  $\mu$ m.

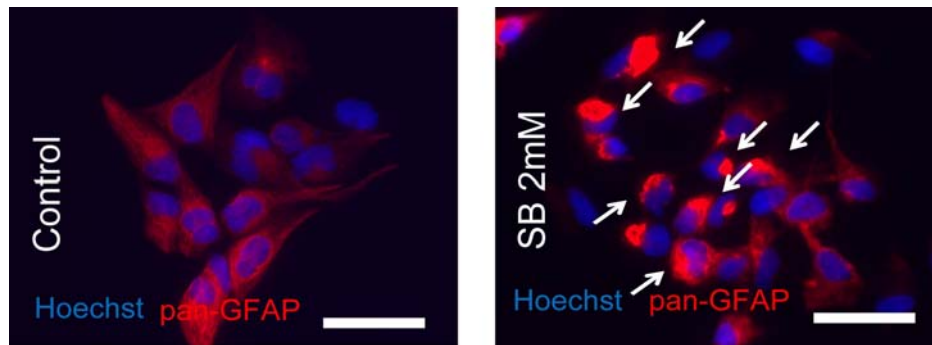

**Supplementary Figure 2: Re-organization of the IF network upon HDAC inhibition using 2mM sodium butyrate.** The IF network of GFAP is redistributed upon treatment with the HDACi SB in a concentration of 2mM. U433 cells were stained with a pan-GFAP together with the DNA stain Hoechst. 2 mM SB treatment for 72 hours induced a drastic redistribution of the GFAP network which aggregated in close proximity to the nucleus. Arrows indicate cells with a re-organized IF network. The scale bars represent 50  $\mu\text{m}$ .

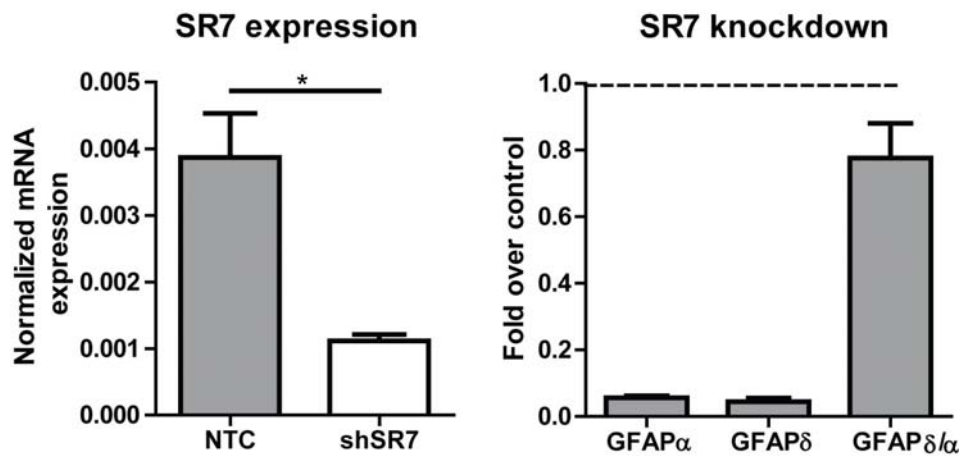

**Supplementary Figure 3: Downregulation of SR7 does not affect the GFAP isoform usage.** qPCR analysis of SR7 and the GFAP transcripts  $\alpha$  and  $\delta$  upon lentiviral transduction of U343 cells with a non targeting control shRNA (NTC) or a shRNA targeting SR7 (shSR7) for 72 hours (n=3). Expression of the GFAP transcripts  $\alpha$  and  $\delta$  and the GFAP $\delta/\alpha$  ratio is depicted as fold over control. Data are presented as mean + SEM. \* p<0.05.

A

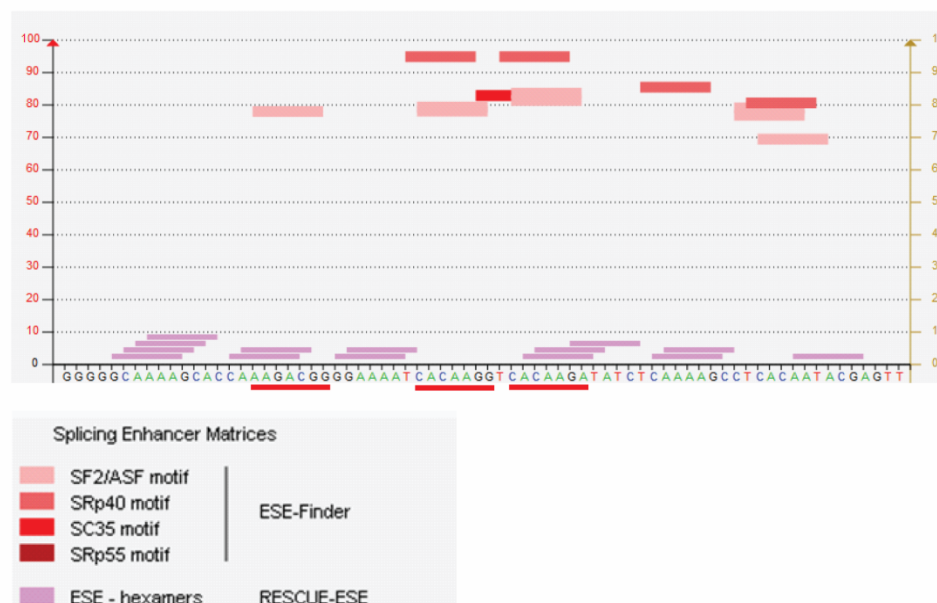

B

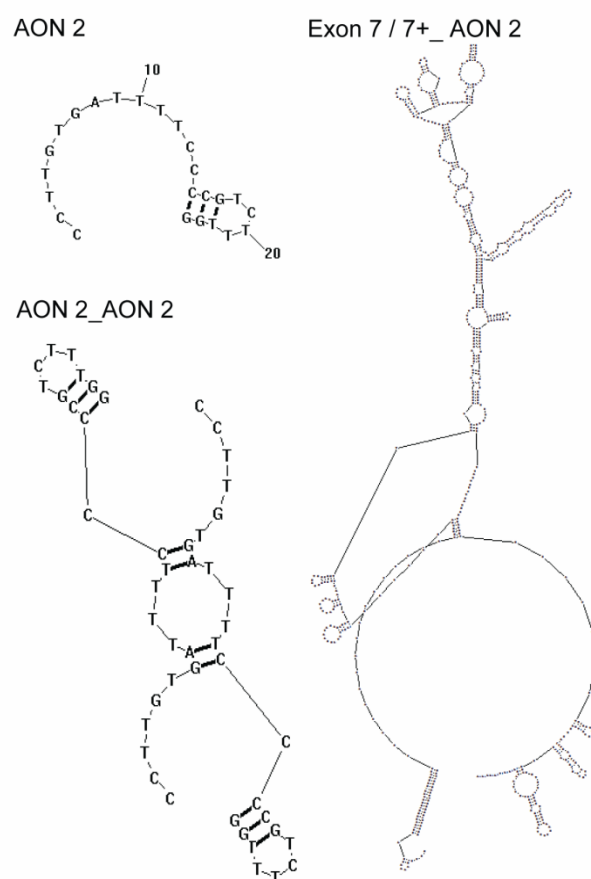

**Supplementary Figure 4. Design of AONs targeting SR binding sites in exon 7+ of the GFAP $\delta$  transcript.** A) Identification of SR binding sites in exon 7+ of the *GFAP* gene. Human splicing finder software output (version 2.4.1) showing putative splice enhancer motives. Selected SR binding sites are underlined in red. The output is based on the presence of multiple RESCUE-ESE or PESE sites and/or overlapping ESE finder sites. B) Secondary structure formation of AON and AON-target complexes. Single strand folding of the AON used to induce exon skipping. B) Dimer formation of the same AON. C) Structure of the AON-exon 7+ complex. The sequence of exon 7 and exon 7+ was used as input sequence. Structures are generated with the RNA structure 4.6 software using the fold RNA single strand (A) and fold RNA bimolecular (B, C) options.

**Supplementary table 1. Primers used in this study.**

| Primer        | Forward sequence          | Reverse sequence          |
|---------------|---------------------------|---------------------------|
| Actin         | GCTCCTCCTGAGCGCAAG        | CATCTGCTGGAAGGTGGACA      |
| 18s           | TTCGTATTGCGCCGCTAGA       | TGGCAAATGCTTTCGCTCT       |
| GAPDH         | TGCACCACCAACTGCTTAGC      | GGCATGGACTGTGGTCATGA      |
| GFAP $\alpha$ | CCCACTCTGCTTTGACTGAGC     | CCTTCTTCGGCCTTAGAGGG      |
| GFAP $\delta$ | TCCAACCTGCAGATTCGAGG      | GGGAATGGTGATCCGGTTCT      |
| GFAP $\kappa$ | GTCAGTACAGCAGGGCCTCG      | AGGAGCGCTGCAGTGTACG       |
| Vimentin      | CGTACGTCAGCAATATGAAAGTGTG | TCAGAGAGGTCAGCAAACCTTGA   |
| Nestin        | GATCTAAACAGGAAGGAAATCCAGG | TCTAGTGTCTCATGGCTCTGGTTTT |
| HDAC3         | CACCATGCCAAGAAGTTTGA      | CCCGAGGGTGGTACTTGAG       |
| HDAC6         | GCTGACTACCTAGCTGCCTG      | TCAAAGCCAGCTGAGACCAG      |
| Jun           | TGTGCGCGCAGCCCAAATA       | CGAGGCGTTGAGGGCATCGT      |
| SR 1          | GCGGTCTGAAAACAGAGTGG      | CTTCACGCATGTGATCCT        |
| SR 2          | AGGTCGCGATCGAAGAGTC       | CACTGCTTGCCGATACATCA      |
| SR 6          | AGCCGCAGTAGATCTCGAAG      | AACGTGATCGACCTTTGCTC      |
| SR 7          | AAAAGGATCGAGGTATTTCCAAT   | GCTGCTTCTTGGTCGTGAA       |
| U2AF2         | CAGGCCTCACGACTACCAG       | GGGACCACAGTGGACACAA       |
| GFAP TSS+500  | CATCCCCTCCTCACTTCTGC      | GCTGGAGGTTGAGAGGGACA      |
| GD1           | CAGCTGCTTGATGTACTAGCCG    | AGGGTGAAAAATCCTTGACAAAGGG |

**Supplementary table 2. Antibodies used for immunocytochemistry**

| <b>Antibody</b>                | <b>Species</b> | <b>Company, Cat #</b>                    | <b>Concentration</b> |
|--------------------------------|----------------|------------------------------------------|----------------------|
| <b>Cleaved caspase 3</b>       | Rabbit         | Cell Signalling, # 9661                  | 1:500                |
| <b>GFAP<math>\delta</math></b> | Rabbit         | Manufactured in house (10-05-2001 Bleed) | 1:250                |
| <b>GFAP-pan</b>                | Rabbit         | Dako, Z0334                              | 1:2000               |
| <b>GFAP-pan</b>                | Mouse          | Sigma, G3893                             | 1:2000               |
| <b>GFAP<math>\alpha</math></b> | Goat           | Santa Cruz biotechnology inc., sc-6170   | 1:1300               |
| <b>H3K27 ac</b>                | Rabbit         | Abcam, ab4729                            | 1:2000               |
| <b>GAPDH</b>                   | Chicken        | Abcam, ab14247                           | 1:10000              |
| <b>Nestin</b>                  | Mouse          | Chemicon, Mab353                         | 1:1500               |
| <b>Vimentin</b>                | Chicken        | Chemicon, AB5733                         | 1:2000               |
